# Supplementary material for: Herbivory Triggers Hydrocarbon-Based Semiochemical Defenses Against Aphids in Food Legumes
Source: Research Square preprint supplement (doi:10.21203/rs.3.rs-7986673/v1), 2025-11-11
Supplement: Supplementary file 1 [file b1cfcfff97517fe5a090cb48.docx]

**Supplement Table**

**Table S1. Comparative analysis of volatile organic compounds (VOCs) emitted by healthy cowpea, green gram and soybean seedlings, identified through GC-MS profiling**

| S. No. | Volatile compounds | Molecular Formula | Cowpea healthy | R time | % Area | Green  Gram healthy | R time | % Area | Soybean healthy | R time | % Area |
| --- | --- | --- | --- | --- | --- | --- | --- | --- | --- | --- | --- |
| 1. | 1-Heptene, 2-isohexyl-6-methyl- | C14H28 | √ | 3.785 | 1.95**l**  ±0.62 | × | - | 0**l** | √ | 3.787 | 2.85**f**  ±0.64 |
| 2. | Hexacontane | C60H122 | √ | 15.217 | 3.08**hij**  ±0.5 | √√ | 16.779,  22.106 | 14.32**c**  ±0.62 | √√ | 16.10,  22.116 | 12.54**c**  ±0.71 |
| 3. | 2-Cyclohexylnonadecane | C25H50 | √ | 15.761 | 3.84**efg**  ±0.5 | × | - | 0**l** | × | 0 | 0**h** |
| 4. | trans-.beta.-Ocimene | C10H16 | × | - | 0**n** | × | - | 0**l** | × | 0 | 0**h** |
| 5. | Octadecane, 5-methyl- | C19H40 | × | - | 0**n** | √ | 4.977 | 4.04**f**  ±0.5 | √ | 4.978 | 3.77**ef**  ±0.35 |
| 6. | 1,3-Methylheptacosane | C28H58 | × | - | 0**n** | × | - | 0**l** | × | 0 | 0**h** |
| 7. | Tetrapentacontane | C54H110 | × | - | 0**n** | × | - | 0**l** | √ | 15.221 | 2.82**f**  ±0.57 |
| 8. | 2-methyl hexacosane | C27H56 | × | - | 0**n** | √ | 6.566 | 1.21**hi**  ±0.5 | × | 0 | 0**h** |
| 9. | Pentatriacontane | C35H72 | × | - | 0**n** | × | - | 0**l** | × | 0 | 0**h** |
| 10. | 1-Dodecanol, 2-hexyl- | C18H38O | × | - | 0**n** | √ | 6.655 | 0.44**k**  ±0.44 | × | 0 | 0**h** |
| 11. | 1-Dodecanethiol | C12H26S | × | - | 0**n** | × | - | 0**l** | × | 0 | 0**h** |
| 12. | Lauryl acetate | C14H28O2 | × | - | 0**n** | √ | 7.082 | 0.96**ij**  ±0.44 | × | 0 | 0**h** |
| 13. | Oxirane, decyl- | C12H24O | √√ | 6.155,  7.792 | 19.01**a**  ±0.44 | √√ | 6.156,  7.793 | 27.18**a**  ±0.5 | √√ | 6.157,  7.794 | 27.41**a**  ±0.57 |
| 14. | 1,4-Benzenedicarboxylic acid, bis(2-methylpropyl) ester | C16H22O4 | √ | 9.313 | 4.32**def**  ±0.44 | × | - | 0**l** | × | 0 | 0**h** |
| 15. | Ether, dodecyl isopropyl | C15H32O | √ | 10.733 | 12.29**b**  ±0.5 | √ | 10.735 | 17.45**b**  ±0.62 | √ | 10.735 | 17.31**b**  ±0.35 |
| 16. | Hexacosyl nonyl ether | C35H72O | √ | 14.933 | 3.63**fgh**  ±0.62 |  |  | 0**l** | × | 0 | 0**h** |
| 17. | Dichloroacetic acid, undecyl ester | C13H24Cl2O2 | × | - | 0**n** | √ | 3.787 | 2.68**g**  ±0.62 | × | 0 | 0**h** |
| 18. | Piperazine, 2,5-dimethyl-3-(2-methylpropyl)- | C10H22N2 | √ | 3.896 | 3.91**ef**  ±0.62 | × | - | 0**l** | √ | 3.898 | 5.31**de**  ±0.64 |
| 19. | 2-(3-Hydroxyprop-1-yn-1-yl)benzonitrile | C10H7NO | √ | 4.657 | 2.47**jkl**  ±0.5 | √ | 4.659 | 3.19**g**  ±0.5 | √ | 4.659 | 3.43**ef**  ±0.61 |
| 20. | Nonadecyl heptafluorobutyrate | C23H39F7O2 | √ | 16.006 | 4.62**de**  ±0.5 | × | - | 0**l** | √ | 16.780 | 6.71**de**  ±0.71 |
| 21. | N-[3-[N-Aziridyl]propyl]cyclohexylamine | C11H22N2 | √ | 16.775 | 4.36**def**  ±0.44 | √ | 17.523 | 5.64**de**  ±0.5 | √ | 17.526 | 5.64**d**  ±0.35 |
| 22. | N-[2-[3-[N-Aziridyl]propyl]aminoethyl]piperazine | C11H24N4 | √√ | 18.530,  20.939 | 12.83**b**  ±0.44 | √ | 18.532 | 4.96**e**  ±0.44 | √ | 19.052 | 4.81**de**  ±0.57 |
| 23. | .alpha.-D-Xylofuranose, cyclic 1,2:3,5-bis(butylboronate) | C13H24B2O5 | × | - | 0**n** | √ | 20.933 | 6.59**d**  ±0.44 | √ | 20.945 | 6.10**de**  ±0.57 |
| 24. | Pyrrolidine, 1-(1-oxopentyl)- | C9H17NO | × | - | 0**n** | √ | 3.898 | 5.72**de**  ±0.5 | × | 0 | 0**h** |
| 25. | Triacontyl trifluoroacetate | C32H61F3O2 | × | - | 0**n** | × | 8.375 | 0.71**jk**  ±0.62 | × | 0 | 0**h** |
| 26. | Hexatriacontyl trifluoroacetate | C38H73F3O2 | × | - | 0**n** | × | - | 0**l** | × | 0 | 0**h** |
| 27. | Eicosyl trifluoroacetate | C22H41F3O2 | × | - | 0**n** | √ | 8.375 | 0.74**jk**  ±0.62 | × | 0 | 0**h** |
| 28. | Pent-4-enoyl amide, 2-methyl-N-ethyl- | C8H15NO | √ | 3.978 | 0.73**m**  ±0.5 | × | - | 0**l** | × | 0 | 0**h** |
| 29. | Carbonic acid, decyl nonyl ester | C20H40O3 | √ | 4.976 | 2.88**ijk**  ±0.62 | × | - | 0**l** | × | 0 | 0**h** |
| 30. | Eicosane | C20H42 | √ | 6.257 | 0.87**m**  ±0.62 | √ | 6.259 | 1.45**h**  ±0.5 | × | 0 | 0**h** |
| 31. | 2,6-Piperidinedione, 1,1'-(1,5-pentanediyl)bis- | C15H22N2O4 | √√ | 17.521,  19.933 | 7.09**c**  ±0.5 | × | - | 0**l** | × | 0 | 0**h** |
| 32. | Lauramide, N-allyl-N-butyl- | C19H37NO | √√ | 18.253,  19.048 | 6.22**c**  ±0.5 | × | - | 0**l** | × | 0 | 0**h** |
| 33. | 2H-pyrrol-2-one, 3-(diethylamino)-1,5-dihydro-4-hydroxy-1-methyl- | C9H16N2O2 | √ | 19.398 | 3.16**ghi**  ±0.44 | × | - | 0**l** | × | 0 | 0**h** |
| 34. | Hexanamide, N-hexanoyl-N-allyl- | C15H27NO2 | √ | 21.503 | 2.41**kl**  ±0.44 | × | - | 0**l** | × | 0 | 0**h** |
| 35. | .alpha.-D-Xylofuranose, cyclic 1,2:3,5-bis(butylboronate) | C13H24B2O5 | √ | 22.110 | 4.82**d**  ±0.5 | × | - | 0**l** | × | 0 | 0**h** |
| 36. | Piperazine, 2,5-dimethyl-3-propyl- | C9H20N2 | × | - | - | √ | 3.980 | 1.36**hi**  ±0.5 | √ | 3.981 | 1.31**g**  ±0.35 |
| 37. | Hexatriacontane | C60H122 | × | - | - | √ | 14.099 | 1.36**h**  ±0.44 | × | 0 | 0**h** |

*Mean of three replications; Each compound is listed with its detection status (√: present; ×: absent), retention time (R. Time), and mean percentage area (with standard error). Mean percentage area with standard error (± SE) from three replications. Data were subject to ANOVA after applying arcsine transformation; **Means followed by the same letter within a column are not significantly different (Tukey’s HSD, α = 0.05).**

**Table S2. Volatile organic compounds (VOCs) detected in cowpea, green gram and soybean seedlings under whitefly (*Bemisia tabaci*) infestation, as analyzed by Gas Chromatography-Mass Spectrometry (GC-MS)**

| S. No. | Volatile compounds | Molecular Formula | Cowpea aphid | R time | % Area | Green  Gram aphid | R time | % Area | Soybean aphid | R time | % Area |
| --- | --- | --- | --- | --- | --- | --- | --- | --- | --- | --- | --- |
| 1. | 1-Heptene, 2-isohexyl-6-methyl- | C14H28 | × | - | 0**n** | √ | 3.786 | 2.40**gh**  ±0.62 | × | - | 0**j** |
| 2. | Eicosane | C20H42 | √ | 6.254 | 1.14**jk**  ±0.62 | √ | 6.257 | 1.12**j**  ±0.5 | √ | 6.259 | 1.03**i**  ±0.62 |
| 3. | Hexacontane | C60H122 | √√ | 16.004,  22.099 | 10.9**c**  ±60.5 | √√√ | 16.007  16.776  22.104 | 17.65**b**  ±0.5 | √√√√ | 16.009,  16.777,  20.932,  22.098 | 26.34**a**  ±0.5 |
| 4. | 2-Cyclohexylnonadecane | C25H50 | √ | 15.758 | 1.76**hij**  ±0.5 | × | - | 0**i** | × | - | 0**j** |
| 5. | trans-.beta.-Ocimene | C10H16 | × | - | 0**n** | √ | 3.323 | 1.17**f**  ±0.44 | × | - | 0**j** |
| 6. | Octadecane, 5-methyl- | C19H40 | × | - | 0**n** | √ | 4.976 | 3.47**g**  ±0.44 | √ | 3.786 | 2.13**h**  ±0.5 |
| 7. | 1,3-Methylheptacosane | C28H58 | × | - | 0**n** | √ | 15.219 | 2.71**gh**  ±0.5 | × | - | 0**j** |
| 8. | Tetrapentacontane | C54H110 | × | - | 0**n** | × | - | 0**i** | √√ | 14.097,  15.219 | 4.11**f**  ±0.44 |
| 9. | Octane, 2,6-dimethyl- | C10H22 | × | - | 0**n** | × | - | 0**i** | √ | 3.898 | 5.17**e**  ±0.44 |
| 10. | Dodecane, 2,6,11-trimethyl- | C15H32 | × | - | 0**n** | × | - | 0**i** | √ | 4.977 | 3.17**g**  ±0.5 |
| 11. | Dodecane, 2,7,10-trimethyl- | C15H32 | √ | 4.397 | 1.76**hi**  ±0.44 | × | - | 0**i** | × | - | 0**j** |
| 12. | 2-methyl hexacosane | C27H56 | √ | 6.562 | 0.98**k**  ±0.44 | × | - | 0**i** | × | - | 0**j** |
| 13. | Pentatriacontane | C35H72 | × | - | 0**n** | × | - | 0**i** | √ | 14.407 | 0.92**i**  ±0.62 |
| 14. | 1-Dodecanol, 2-hexyl- | C18H38O | √ | 6.650 | 0.33**m**  ±0.5 | × | - | 0**i** | × | - | 0**j** |
| 15. | 1-Dodecanethiol | C12H26S |  | - | 0**n** | × | - | 0**i** | √ | 10.732 | 15.85**c**  ±0.62 |
| 16. | Lauryl acetate | C14H28O2 | √ | 7.075 | 0.82**km**  ±0.62 | × | - | 0**i** | × | - | 0**j** |
| 17. | Oxirane, decyl- | C12H24O | √√ | 6.152  7.787 | 18.04**a**  ±0.62 | √√ | 6.155  7.791 | 23.42**a**  ±0.62 | √ | 7.790 | 20.48**b**  ±0.5 |
| 18. | 1,4-Benzenedicarboxylic acid, bis(2-methylpropyl) ester | C16H22O4 | √ | 9.308 | 3.44**f**  ±0.5 | × | - | 0**i** | × | - | 0**j** |
| 19. | Ether, dodecyl isopropyl | C15H32O | √ | 10.729 | 14.46**b**  ±0.5 | √ | 10.733 | 15.11**c**  ±0.62 | × | - | 0**j** |
| 20. | Hexacosyl nonyl ether | C35H72O | × | - | 0**n** | × | - | 0**i** | √√ | 15.762 | 2.94**g**  ±0.5 |
| 21. | 5,8-Tridecadione | C13H24O2 | √ | 19.203 | 1.30**ijk**  ±0.44 | √ | 19.211 | 1.70**i**  ±0.5 | × | - | 0**j** |
| 22. | 2-Butenedioic acid (Z)-, monododecyl ester | C16H28O4 | × | - | 0**n** | × | - | 0**i** | √ | 6.156 | 6.22**d**  ±0.44 |
| 23. | Dichloroacetic acid, undecyl ester | C13H24Cl2O2 | √ | 3.783 | 2.18**gh**  ±0.44 | × | - | 0**i** | × | - | 0**j** |
| 24. | Piperazine, 2,5-dimethyl-3-(2-methylpropyl)- | C10H22N2 | √ | 3.977 | 1.05**k**  ±0.5 | √ | 3.980 | 1.14**j**  ±0.5 | √ | 3.981 | 1.14**i**  ±0.44 |
| 25. | 2-(3-Hydroxyprop-1-yn-1-yl)benzonitrile | C10H7NO | √ | 4.655 | 2.69**fg**  ±0.62 | √ | 4.657 | 2.94**fg**  ±0.44 | √ | 4.659 | 3.15**g**  ±0.5 |
| 26. | Nonadecyl heptafluorobutyrate | C23H39F7O2 | √√ | 8.654 | 0.54**m**  ±0.62 | × | - | 0**i** | √ | 4.659 | 3.15**g**  ±0.5 |
| 27. | Nonadecyl pentafluoropropionate | C22H39F5O2 | √ | 16.774 | 7.89**d**  ±0.5 | × | - | 0**i** | × | - | 0**j** |
| 28. | N-[3-[N-Aziridyl]propyl]cyclohexylamine | C11H22N2 | √ | 17.518 | 4.70**e**  ±0.5 | × | - | 0**i** | × | - | 0**j** |
| 29. | N-[2-[3-[N-Aziridyl]propyl]aminoethyl]piperazine | C11H24N4 | √√ | 18.526,  19.392 | 7.82**d**  ±0.44 | √√ | 18.533,  19.397 | 7.80**d**  ±0.44 | × | - | 0**j** |
| 30. | .alpha.-D-Xylofuranose, cyclic 1,2:3,5-bis(butylboronate) | C13H24B2O5 | √ | 20.929 | 5.60**e**  ±0.62 | √ | 20.934 | 5.46**e**  ±0.5 | × | - | 0**j** |
| 31. | Pyrrolidine, 1-(1-oxopentyl)- | C9H17NO | √ | 3.894 | 4.63**d**  ±0.44 | √ | 3.897 | 4.70**e**  ±0.62 | × | - | 0**j** |
| 32. | Triacontyl trifluoroacetate | C32H61F3O2 | √ | 8.368 | 0.55**e**  ±0.62 | √ | 8.373 | 0.59**k**  ±0.62 | × | - | 0**j** |
| 33. | Hexatriacontyl trifluoroacetate | C38H73F3O2 | √ | 8.450 | 0.53**m**  ±0.5 | × | - | 0**i** | × | - | 0**j** |
| 34. | Eicosyl trifluoroacetate | C22H41F3O2 | × | - | 0**n** | √ | 8.658 | 0.64**k**  ±0.5 | × | - | 0**j** |
| 35. | Tetrapentacontane, 1,54-dibromo- | C54H108Br2 | × | - | 0**n** | √ | 15.762 | 2.07**hi**  ±0.5 | × | - | 0**j** |
| 36. | 1,3,6,8-Tetraazatricyclo(4.4.1.1(3,8)dodecane | C8H16N4 | × | - | 0**n** | √ | 17.522 | 4.93**e**  ±0.44 | × | - | 0**j** |
| Total | | | 26 | - | - | 22 | - | - | 19 | - | - |
| Category | | | Cowpea | - | - | Green Gram | - | - | Soybean | - | - |
| Hydrocarbons | | | 06 | - | - | 08 | - | - | 11 | - | - |
| Acid, alcohol, esters | | | 07 | - | - | 04 | - | - | 04 | - | - |
| Others | | | 13 | - | - | 10 | - | - | 04 | - | - |
| Total | | | 26 | - | - | 22 | - | - | 19 | - | - |

*Mean of three replications; Each compound is listed with its detection status (√: present; ×: absent), retention time (R. Time), and mean percentage area (with standard error). Mean percentage area with standard error (± SE) from three replications. Data were subject to ANOVA after applying arcsine transformation; **Means followed by the same letter within a column are not significantly different (Tukey’s HSD, α = 0.05).**
